# Supplementary material
Source: HighWire-hosted journal article supplement (https://cmajopen-stage.highwire.org/highwire/filestream/88642/field_highwire_adjunct_files/2/open-2021-0195-3-at.pdf)
Supplement: open-2021-0195-3-at.pdf [file open-2021-0195-3-at.pdf]

**Appendix 3.** Adjusted odds ratios for being up-to-date with glucose testing among adults aged 40+ years in Ontario, 2017

| Variable                                                       | Value       | Odds ratio (95% CI)  | P-value |
|----------------------------------------------------------------|-------------|----------------------|---------|
| Sex (ref=male)                                                 | Female      | 1.25 (1.24, 1.25)    | <.001   |
| Age, years (ref=40-49)                                         | 50-59       | 1.44 (1.43, 1.45)    | <.001   |
|                                                                | 60-69       | 1.97 (1.96, 1.98)    | <.001   |
|                                                                | 70-79       | 2.01 (2.00, 2.03)    | <.001   |
|                                                                | 80+         | 1.31 (1.30, 1.33)    | <.001   |
| Rural residence                                                |             | 1.09 (1.08, 1.09)    | <.001   |
| Neighbourhood income quintile (ref=highest, 5)                 | 1 (lowest)  | 0.84 (0.84, 0.85)    | <.001   |
|                                                                | 2           | 0.92 (0.92, 0.93)    | <.001   |
|                                                                | 3           | 0.98 (0.97, 0.98)    | <.001   |
|                                                                | 4           | 1.02 (1.01, 1.02)    | <.001   |
|                                                                | Unknown     | 1.18 (1.05, 1.33)    | 0.007   |
| Ethnicity (ref=General)                                        | Chinese     | 0.99 (0.98, 1.00)    | 0.05    |
|                                                                | South Asian | 1.21 (1.19, 1.23)    | <.001   |
| Number of visits to a primary care physician (2014-16) (ref=0) | 1-3         | 4.48 (4.45, 4.51)    | <.001   |
|                                                                | 4-9         | 17.51 (17.39, 17.64) | <.001   |
|                                                                | 10+         | 9.16 (9.11, 9.22)    | <.001   |
| Hypertension                                                   |             | 1.59 (1.58, 1.60)    | <.001   |
| Hyperlipidemia                                                 |             | 2.76 (2.71, 2.81)    | <.001   |
| Any history of cardiovascular disease*                         |             | 1.29 (1.27, 1.31)    | <.001   |

\* Defined as any previous hospitalization for myocardial infarction, stroke, heart failure, percutaneous coronary intervention or coronary artery bypass graft surgery.
